# Supplementary material
Source: PubMed Central journal article supplement (PMC3682481)

**Appendix S1** Bivariate association  $p$  values and LD plot against chromosome position around the region of group I SNP.

A span of about 600kb upstream and 600kb downstream were selected out from both Chinese and Caucasian sample. Bivariate  $p$  values and LD patterns were plotted against chromosome position. Among all the SNPs, only the three SNPs of group I in Chinese sample showed moderate significant associations, while such association did not show in Caucasian sample. For the LD pattern analysis, the three SNPs of group I formed a block in both population sample, but differences were observed in haplotype phase and frequency (Fig 2).

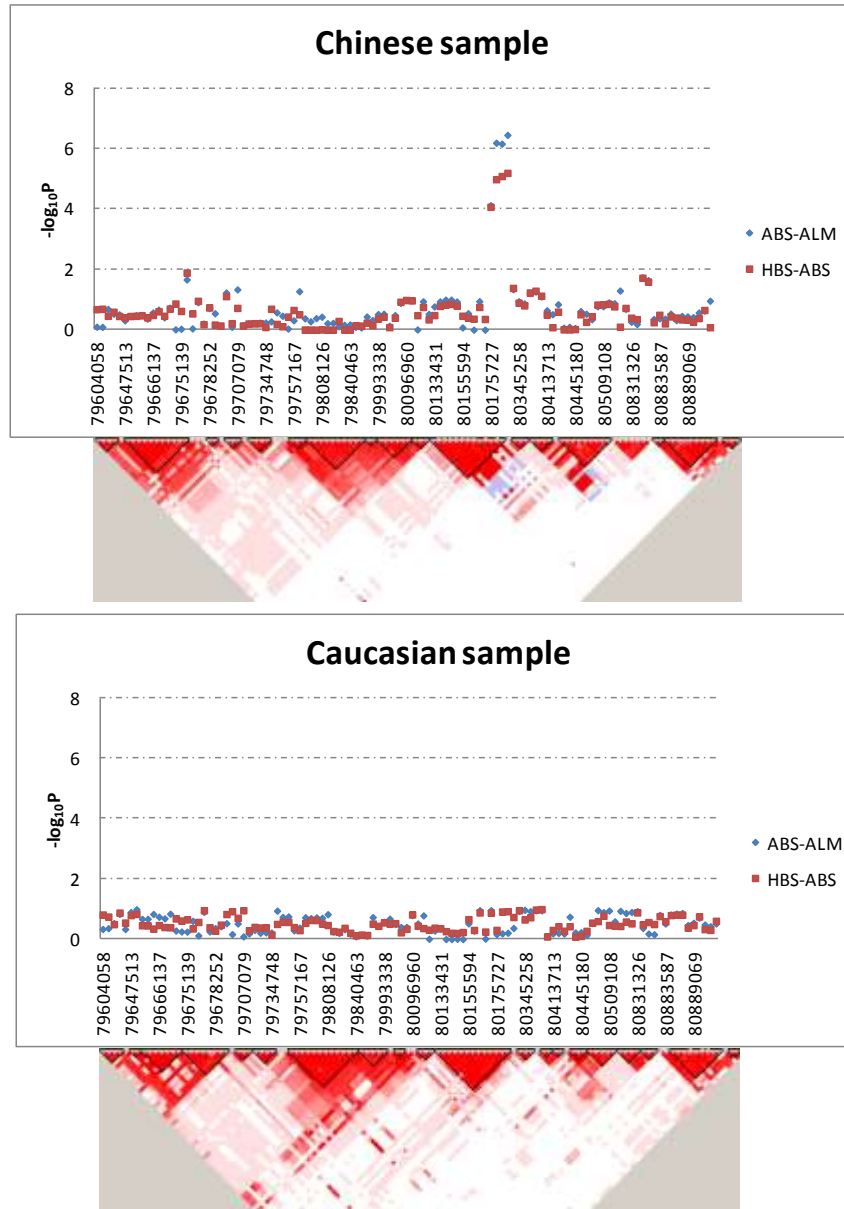

Supplement: NIHMS418310-supplement-supplement_1.pdf [file NIHMS418310-supplement-supplement_1.pdf]
